# Supplementary material for: Hyperresponsiveness of the Neural Fear Network During Fear Conditioning and Extinction Learning in Male Cocaine Users
Source: Atypon-hosted journal article supplement (doi:10.1176/appi.ajp.2016.15040433), 2016-04-15
Supplement: appi.ajp.2016.15040433.ds001.pdf [file appi.ajp.2016.15040433.ds001.pdf]

## Supplementary Methods

***Fear conditioning and extinction measurements and task:*** In this study a classical fear conditioning paradigm was used. Briefly, this paradigm consisted of a habituation, conditioning and extinction phase. The conditioned stimuli (CS) consisted of yellow and blue squares and the unconditioned stimulus (US) was an aversive electrical stimulation to the participant's wrist. Before the imaging session, MR compatible carbon electrodes (Kendall H135TSG) for electrical stimulation were placed on the right wrist 1-2 cm apart. All subjects selected a level of shock intensity that was experienced as highly annoying but not painful, to be used in the experiment. Intensities could vary between 1 and 99 mA with a constant voltages of 400 V.

In the habituation phase, the 4 CS+ and 4 CS- were presented in a pseudo-random manner. During the conditioning phase, the CS+ was paired with the US at a partial reinforcement rate of 33%. There were 18 CS- trials, 12 CS+ trials that were unpaired with the US and 6 CS+ trials that were paired with the US. The US directly followed the offset of the CS+. After a break of approximate 30 seconds the extinction phase began. During this phase 18 CS+ trials and 18CS- trials were presented, but none of the CS+ trials were paired with an electrical shock. For each trial during the experiment, the CS+ and CS- were presented for 4 seconds, the US was presented for 2 ms, and the intertrial interval varied between 6.5 and 9.5 seconds during which a fixation cross was presented. Before onset of each phase subjects were instructed that they could receive electrical shocks and that they should pay attention on the relation between the visual stimuli presented and the electrical shocks.

***fMRI data acquisition and first-level analysis:*** Images were acquired on a 3.0-T Achieva full-body scanner (Philips Medical Systems, Best, the Netherlands) using a 32 channel SENSE head coil. Echo planar images (EPIs) were taken covering the whole brain, with a total of 37 ascending axial slices (3x3x3mm voxel size; slice gap 3mm; TR/TE 2000ms/28ms; matrix 80x80). Also a T1-3D high resolution anatomical scan (TR/TE 8.2/3.7; matrix 240x187; 1x1x1 voxel; transverse slices) was taken.

fMRI data were analyzed using SPM8. Preprocessing included realignment, slice-time correction, coregistration of the structural and functional scans, normalization to MNI-space based on the segmented structural scan and smoothing with a kernel of 8 mm full-width at half maximum. First level models included separate regressors for CS-, CS+ paired with the US, CS+ unpaired with the US and the US itself, during habituation, conditioning and extinction blocks. These regressors were convolved with the canonical hemodynamic response function. Six realignment parameters were included as regressors of no interest. A high pass filter (1/128 Hz) was included in the first level model to correct for low frequency signal drift.

***Physiological data acquisition and analysis:*** Skin conductance was measured simultaneously with fMRI acquisition. Skin-conductance response (SCRs) was measured using an MRI compatible GSR set with Ag/AgCl electrodes covered in isotonic gel (Brain Products GmbH, Germany) with a constant voltage of 0.5V. Electrodes were placed at the medial phalanges of the index and middle finger. SCR was recorded using Net Station (version 4.5.2) at a sample rate of 250 Hz. SCR was recorded from the onset to the end of the fear conditioning paradigm. The MRI artefact was removed using the MRI artifact removal tool in NetStation. Subsequently, the SCR signal was low-pass filtered using a cut-off value of 2 Hz.

### ***Exploring the effects of poly-substance abuse on the neural correlates of aversive conditioning and extinction learning.***

The relation between state anxiety and days since last use was tested by adding these covariates to the fMRI model, for early conditioning, late conditioning, early extinction and late extinction. To explore whether abnormalities in aversive conditioning and extinction were related to the amount of substance used, we aimed to test the relation between cannabis, nicotine, alcohol and cocaine use and the neural correlates of aversive conditioning and extinction learning. The data of drug use could not be transformed to have a normal distribution. Therefore cocaine users were divided into mild or severe users of alcohol, nicotine and cocaine, based on the median split mild alcohol use < 19.9 glasses a week, severe alcohol use  $\geq$  19.9 glasses a week; no or mild nicotine use < FTND score of 5, severe nicotine use  $\geq$  FTND score of 5; mild cocaine use < 7.6 grams per month, severe cocaine use  $\geq$  7.6 grams per month. Cannabis use was based on whether or not they used less than weekly (no to mild use ranging from 0 to 3.8 days per month) or more than weekly (severe user ranging from 4.3 to 30.3 days per month). Chi-square tests indicated that there was no relation between mild or severe use of the four substances.

## **Supplementary Results**

### ***Main task effects***

Table S1 and Figure S1 show the main task effect of aversive conditioning and extinction learning on brain activation.

### ***The correlation between days since last use and fMRI during fear conditioning and extinction***

The regression analysis did not show any significant relation between days since last use and any fMRI measure.

### ***The correlation between SCR and fMRI during fear conditioning and extinction***

Table S2 and Figure S2 show the brain regions of which the activation is significantly correlated to the skin conductance response, during aversive conditioning and extinction learning.

### ***Effect state anxiety and poly-substance use on neural correlates of fear extinction***

Table S3 and Figure S3 show the correlation between state anxiety and aversive conditioning and extinction learning as well as the difference between mild and heavy cannabis and cocaine users.

**FIGURE S1–S3.** Figure S1 (left-hand panel) shows the main effects of stimulus type, for all four phases of the task. In red the CS+>CS- contrast, in blue the CS->CS+ contrast. Figure S2 (center panel) shows the correlations between SCRs and fMRI response, during all four phases of the task. Red shows the positive correlations, and blue shows the negative correlations. Figure S3 (right-hand panel) shows the effects of state anxiety, cannabis and cocaine use.

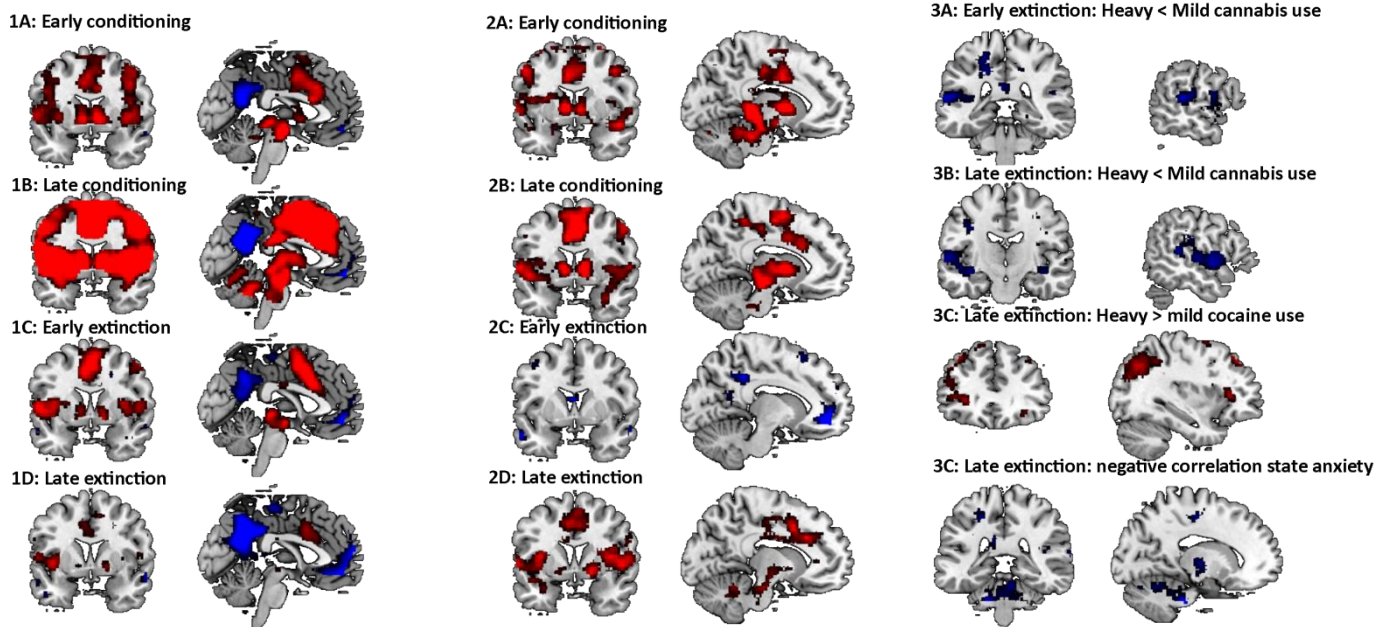

**TABLE S1. Neural correlates of aversive conditioning and extinction: main task effects**

|                           | Cluster size<br># voxels | Cluster<br>P-value | Peak-Voxel<br>z-value    | Voxel<br>MNI-coordinates |      |     | Voxel region                   |   |          |
|---------------------------|--------------------------|--------------------|--------------------------|--------------------------|------|-----|--------------------------------|---|----------|
| <b>Early Conditioning</b> |                          |                    |                          |                          |      |     |                                |   |          |
| CS+ > CS-                 | 4703                     | <0.001             | 5.79                     | 32                       | 24   | -4  | R Insula                       |   |          |
|                           |                          |                    | 5.18                     | 48                       | 18   | 4   | R Inferior frontal gyrus       |   |          |
| CS+ > CS-                 | 3831                     | <0.001             | 3.92                     | 42                       | 4    | 38  | R Precentral gyrus             |   |          |
|                           |                          |                    | 3.8                      | 44                       | 8    | 14  | R Rolandic operculum           |   |          |
|                           |                          |                    | 4.31                     | -10                      | 2    | 0   | L Pallidum                     |   |          |
|                           |                          |                    | 3.03                     | -8                       | -8   | 10  | L Thalamus                     |   |          |
| CS+ > CS-                 | 3420                     | <0.001             | 3.19                     | 18                       | -10  | 4   | R Thalamus                     |   |          |
|                           |                          |                    | 5.34                     | -30                      | 22   | -2  | L Insula                       |   |          |
|                           |                          |                    | 4.2                      | -56                      | 6    | 2   | L Inferior frontal gyrus       |   |          |
| CS+ > CS-                 | 966                      | 0.028              | 3.47                     | -44                      | -4   | 54  | L Precentral gyrus             |   |          |
|                           |                          |                    | 4.85                     | 60                       | -40  | 22  | R Superior temporal gyrus      |   |          |
| CS+ > CS-                 | 1111                     | 0.015              | 4.56                     | -56                      | -26  | 22  | L Supramarginal gyrus          |   |          |
|                           |                          |                    | 2.42                     | -62                      | -42  | 16  | L Superior temporal gyrus      |   |          |
| CS- > CS+                 | 3697                     | <0.001             | 4.38                     | 0                        | 16   | 22  | L Anterior cingulate gyrus     |   |          |
|                           |                          |                    | 4.24                     | -4                       | 0    | 44  | L Middle cingulate             |   |          |
|                           |                          |                    | 4.35                     | 10                       | 14   | 36  | R Middle cingulate             |   |          |
|                           |                          |                    | 3.69                     | 6                        | 14   | 56  | R Superior motor area          |   |          |
|                           |                          |                    | 4.49                     | -2                       | -58  | 26  | L Precuneus                    |   |          |
|                           |                          |                    | 3.62                     | 10                       | -48  | 14  | R Precuneus                    |   |          |
| CS- > CS+                 | 1802                     | 0.001              | 3.57                     | -6                       | -42  | 34  | L Posterior cingulate gyrus    |   |          |
|                           |                          |                    | <b>Late conditioning</b> |                          |      |     |                                |   |          |
|                           |                          |                    | <b>CS+ &gt; CS-</b>      |                          |      |     |                                |   |          |
| CS+ > CS-                 | 59758                    | <0.001             | Inf                      | -30                      | 24   | 4   | L Insula                       |   |          |
|                           |                          |                    | Inf                      | 36                       | 28   | -2  | R Insula                       |   |          |
|                           |                          |                    | Inf                      | -6                       | 8    | 38  | L Middle cingulate gyrus       |   |          |
|                           |                          |                    | Inf                      | -2                       | 2    | 52  | L Superior motor area          |   |          |
|                           |                          |                    | Inf                      | 2                        | 4    | 52  | R Superior motor area          |   |          |
|                           |                          |                    | Inf                      | -60                      | -30  | 22  | L Superior temporal gyrus      |   |          |
|                           |                          |                    | Inf                      | 64                       | -40  | 34  | R Supramarginal gyrus          |   |          |
|                           |                          |                    | Inf                      | -48                      | 2    | 0   | L Rolandic operculum           |   |          |
| CS+ > CS-                 | 57                       | 0.001              | 4.01                     | -20                      | 0    | -12 | L Amygdala <sup>a</sup>        |   |          |
|                           |                          |                    | 2.94                     | 32                       | -2   | -12 | R Amygdala <sup>a</sup>        |   |          |
| CS+ > CS-                 | 16                       | 0.045              |                          |                          |      |     |                                |   |          |
|                           |                          |                    | <b>CS- &gt; CS+</b>      |                          |      |     |                                |   |          |
| CS- > CS+                 | 2850                     | <0.001             | 6.1                      | -4                       | -60  | 24  | L Precuneus                    |   |          |
|                           |                          |                    | 4.03                     | 12                       | -52  | 12  | R Precuneus                    |   |          |
|                           |                          |                    | 3.94                     | 14                       | -48  | 10  | R Calcarine cortex             |   |          |
| CS- > CS+                 | 1235                     | 0.008              | 5.96                     | -46                      | -68  | 28  | L Angular gyrus                |   |          |
|                           |                          |                    | 2.46                     | -22                      | -86  | 32  | L Superior occipital gyrus     |   |          |
|                           |                          |                    | 2.64                     | -28                      | -84  | 34  | L Middle occipital gyrus       |   |          |
| CS- > CS+                 | 982                      | 0.026              | 5.83                     | 46                       | -60  | 26  | R Angular gyrus                |   |          |
|                           |                          |                    | 3.18                     | 32                       | -80  | 40  | R Superior occipital gyrus     |   |          |
|                           |                          |                    | 3.12                     | 38                       | -76  | 38  | R Middle occipital gyrus       |   |          |
| CS- > CS+                 | 962                      | 0.029              | 4.38                     | -4                       | 48   | -12 | L Medial orbital frontal gyrus |   |          |
|                           |                          |                    | 4.35                     | 2                        | 36   | -18 | R Gyrus rectus                 |   |          |
|                           |                          |                    | 4.26                     | -12                      | 58   | 10  | L Superior frontal gyrus       |   |          |
|                           |                          |                    | 3.27                     | 14                       | 58   | 8   | R Superior frontal gyrus       |   |          |
|                           |                          |                    | 3.31                     | -26                      | 28   | 50  | L Middle frontal gyrus         |   |          |
|                           |                          |                    | 3.15                     | 8                        | 38   | -12 | R Medial orbital frontal gyrus |   |          |
| <b>Early extinction</b>   |                          |                    |                          |                          |      |     |                                |   |          |
| CS+ > CS-                 | 1092                     | 0.01               | 5.77                     | -52                      | -30  | 24  | L Supramarginal gyrus          |   |          |
|                           |                          |                    | 3799                     | <0.001                   | 5.56 | -36 | 14                             | 4 | L Insula |
| CS+ > CS-                 | 3799                     | <0.001             | 4.35                     | -52                      | 4    | 6   | L Inferior frontal gyrus       |   |          |
|                           |                          |                    | 3.8                      | -42                      | 0    | 12  | L Superior temporal gyrus      |   |          |
|                           |                          |                    | 3.47                     | -10                      | 2    | 2   | L pallidum                     |   |          |
|                           |                          |                    | 3.79                     | 14                       | 2    | -2  | R Pallidum                     |   |          |
|                           |                          |                    | 3.62                     | -24                      | 4    | 8   | L Putamen                      |   |          |
|                           |                          |                    | 3.53                     | 8                        | -20  | -8  | L Red Nucleus                  |   |          |
|                           |                          |                    | 2.57                     | -10                      | -16  | 0   | L Thalamus                     |   |          |
| CS+ > CS-                 | 2319                     | <0.001             | 5.47                     | 34                       | 24   | -4  | R Insula                       |   |          |
|                           |                          |                    | 4.68                     | 42                       | 22   | 6   | R Inferior frontal gyrus       |   |          |
|                           |                          |                    | 3.59                     | 52                       | 6    | 4   | R Rolandic operculum           |   |          |
| CS+ > CS-                 | 3211                     | <0.001             | 2.57                     | 42                       | 10   | -26 | R Superior temporal pole       |   |          |
|                           |                          |                    | 4.84                     | -8                       | 10   | 42  | L Middle cingulate gyrus       |   |          |
|                           |                          |                    | 4.64                     | 4                        | 16   | 32  | R Middle cingulate gyrus       |   |          |
|                           |                          |                    | 4.57                     | -4                       | 10   | 44  | L Superior motor area          |   |          |
|                           |                          |                    | 4.59                     | 6                        | 8    | 46  | R Superior motor area          |   |          |
|                           |                          |                    | 4.57                     | -2                       | 16   | 30  | L Anterior cingulate gyrus     |   |          |

|                        |       |        |      |     |     |     |                                |
|------------------------|-------|--------|------|-----|-----|-----|--------------------------------|
|                        |       |        | 3.24 | 4   | 28  | 18  | R Anterior cingulate gyrus     |
|                        |       |        | 3.22 | 18  | 6   | 68  | R Superior frontal gyrus       |
|                        | 942   | 0.021  | 4.3  | 64  | -38 | 22  | R Superior temporal gyrus      |
|                        |       |        | 4.29 | 60  | -38 | 24  | R Supramarginal gyrus          |
| <hr/>                  |       |        |      |     |     |     |                                |
| <b>CS-&gt; CS+</b>     | 2562  | <0.001 | 5.48 | 54  | -62 | 24  | R Angular gyrus                |
|                        |       |        | 4.33 | 36  | -36 | -14 | R Parahippocampal gyrus        |
|                        |       |        | 3.99 | 26  | -32 | -16 | R Fusiform gyrus               |
|                        |       |        | 3.91 | 46  | -80 | 12  | R Middle occipital gyrus       |
|                        |       |        | 3.91 | 48  | -76 | 10  | R Middle temporal gyrus        |
|                        |       |        | 3.61 | 46  | -54 | -16 | R Inferior temporal gyrus      |
|                        |       |        | 2.85 | 12  | -46 | 2   | R Lingual gyrus                |
|                        |       |        | 2.82 | 14  | -84 | 34  | R Cuneus cortex                |
|                        | 4644  | <0.001 | 4.85 | -24 | 20  | 50  | L Middle frontal gyrus         |
|                        |       |        | 5.35 | -34 | 16  | 48  | R Middle frontal gyrus         |
|                        |       |        | 5.04 | -12 | 50  | 36  | L Superior frontal gyrus       |
|                        |       |        | 4.82 | -22 | 22  | 44  | L Superior motor area          |
|                        |       |        | 4.46 | -8  | 48  | -12 | L Medial Orbital frontal gyrus |
|                        | 6673  | <0.001 | 4.89 | -60 | -6  | -16 | L Middle temporal gyrus        |
|                        |       |        | 4.7  | -44 | -64 | 36  | L Angular gyrus                |
|                        |       |        | 3.98 | -30 | -76 | 42  | L Inferior parietal gyrus      |
|                        |       |        | 3.97 | -6  | -54 | 24  | L Precuneus cortex             |
|                        |       |        | 3.86 | -10 | -50 | 26  | L Posterior cingulate cortex   |
|                        |       |        | 3.79 | -12 | -48 | 36  | L Middle cingulate cortex      |
|                        |       |        | 3.75 | -22 | -42 | -12 | L Fusiform gyrus               |
|                        | 1010  | 0.015  | 3.24 | 62  | -4  | 26  | R Postcentral gyrus            |
|                        |       |        | 3.14 | 34  | -22 | 50  | R Precentral gyrus             |
| <hr/>                  |       |        |      |     |     |     |                                |
| <b>Late extinction</b> |       |        |      |     |     |     |                                |
| <b>CS+ &gt; CS-</b>    | 1884  | <0.001 | 5.24 | 38  | 24  | 6   | R Insula                       |
|                        |       |        | 3.41 | 56  | 12  | 4   | R Inferior frontal gyrus       |
|                        |       |        | 2.83 | 52  | 4   | 10  | R Rolandic operculum           |
|                        | 1262  | 0.004  | 4.73 | -32 | 18  | 8   | L Insula                       |
|                        |       |        | 3.21 | -54 | 4   | 6   | L Rolandic operculum           |
|                        | 1139  | 0.008  | 3.37 | -4  | 10  | 36  | L Middle cingulate gyrus       |
|                        |       |        | 3.7  | 12  | 16  | 40  | R Middle cingulate gyrus       |
|                        |       |        | 3.2  | 8   | 20  | 28  | R Anterior cingulate gyrus     |
|                        |       |        | 2.96 | 6   | 8   | 50  | R Superior motor area          |
| <hr/>                  |       |        |      |     |     |     |                                |
| <b>CS- &gt; CS+</b>    | 3930  | <0.001 | 5.08 | 8   | -22 | 56  | R Superior motor area          |
|                        |       |        | 4.08 | -10 | -26 | 60  | L Paracentral lobule           |
|                        |       |        | 4.85 | 10  | -26 | 58  | R Paracentral lobule           |
|                        |       |        | 4.56 | 58  | -8  | 32  | R Postcentral gyrus            |
|                        |       |        | 3.84 | 40  | -24 | 54  | R Precentral gyrus             |
|                        | 13937 | <0.001 | 5.34 | -14 | -52 | 12  | L Calcarine cortex             |
|                        |       |        | 5.34 | -26 | -20 | -16 | L Hippocampus                  |
|                        |       |        | 5.14 | 26  | -18 | -18 | R Hippocampus                  |
|                        |       |        | 5.33 | -8  | -56 | 18  | L Precuneus                    |
|                        |       |        | 5.11 | -42 | -70 | 38  | L Angular gyrus                |
|                        |       |        | 5.06 | -4  | -54 | 28  | L Posterior cingulate cortex   |
|                        |       |        | 4.65 | 22  | -32 | -10 | R Parahippocampal gyrus        |
|                        | 4405  | <0.001 | 5.01 | -20 | 28  | 54  | L Superior frontal gyrus       |
|                        |       |        | 4.76 | 4   | 40  | -14 | R Medial orbital frontal gyrus |
|                        |       |        | 4.21 | -24 | 20  | 50  | L Middle frontal gyrus         |
|                        | 1105  | 0.009  | 4.83 | -60 | -10 | 36  | L Postcentral gyrus            |
|                        | 974   | 0.018  | 4.49 | 26  | 32  | 46  | R Middle frontal gyrus         |
|                        |       |        | 4.01 | 28  | 22  | 50  | R Superior frontal gyrus       |
|                        | 1125  | 0.008  | 4.13 | 56  | -64 | 20  | R Middle temporal gyrus        |
|                        |       |        | 3.82 | 52  | -62 | 24  | R Angular gyrus                |
|                        |       |        | 3.68 | 44  | -58 | 24  | R Precuneus                    |
|                        |       |        | 3.57 | 18  | -84 | 38  | R Cuneus                       |
|                        |       |        | 2.82 | 42  | -76 | 18  | R Middle occipital gyrus       |
|                        | 71    | 0.003  | 3.80 | -20 | -8  | -16 | L Amygdala <sup>a</sup>        |

All results were  $p < 0.05$ , cluster level family-wise error rate corrected with an initial height threshold of  $p = 0.01$  uncorrected

<sup>a</sup>Corrected for the volume of the right amygdala,  $p_{\text{peak voxel}} < 0.05$

**TABLE S2. Neural correlates of aversive conditioning and extinction: interactions with skin conductance response**

|                                                 | Cluster size<br># voxels | Cluster<br>P-value | Voxel<br>z-value | Peak voxel<br>MNI-coordinates |     |     | Voxel region                   |
|-------------------------------------------------|--------------------------|--------------------|------------------|-------------------------------|-----|-----|--------------------------------|
| <b><u>Early Conditioning (CS+&gt;CS-)</u></b>   |                          |                    |                  |                               |     |     |                                |
| Positive correlations                           | 13493                    | <0.001             | 5.4              | 30                            | -52 | -28 | R Cerebellum                   |
|                                                 |                          |                    | 4.34             | 0                             | -14 | 6   | L Thalamus                     |
|                                                 |                          |                    | 4.13             | 46                            | 6   | -14 | R Superior temporal pole       |
|                                                 | 4875                     | <0.001             | 4.53             | -2                            | -6  | 66  | L Superior motor area          |
|                                                 |                          |                    | 3.64             | 6                             | 12  | 46  | R Superior motor area          |
|                                                 |                          |                    | 4.49             | -6                            | 0   | 38  | L Middle cingulate gyrus       |
|                                                 |                          |                    | 4.16             | 0                             | 20  | 24  | L Anterior cingulate gyrus     |
|                                                 |                          |                    | 3.99             | -32                           | -4  | 64  | L Precentral gyrus             |
|                                                 |                          |                    | 3.57             | 4                             | 28  | 46  | R Superior frontal gyrus       |
|                                                 | 893                      | 0.017              | 3.93             | 56                            | -40 | 22  | R Superior temporal gyrus      |
|                                                 |                          |                    | 3.45             | 52                            | -56 | 4   | R Middle temporal cortex       |
|                                                 |                          |                    | 3.11             | 60                            | -32 | 26  | R Supramarginal gyrus          |
|                                                 |                          |                    | 2.79             | 60                            | -22 | 48  | R Postcentral gyrus            |
|                                                 | 763                      | 0.036              | 3.8              | -64                           | -34 | 32  | L Supramarginal gyrus          |
|                                                 |                          |                    | 3.42             | -62                           | -28 | 16  | L Superior temporal gyrus      |
|                                                 |                          |                    | 3.08             | -62                           | -18 | 22  | L Postcentral gyrus            |
|                                                 |                          |                    | 2.87             | -46                           | -20 | 16  | L Rolandic operculum           |
|                                                 | 97                       | 0.004              | 3.74             | -18                           | -2  | -12 | L Amygdala                     |
|                                                 | 28                       | 0.020              | 3.26             | 18                            | -2  | -14 | R Amygdala                     |
| <b><u>Late conditioning (CS+ &gt; CS -)</u></b> |                          |                    |                  |                               |     |     |                                |
| Positive correlations                           | 6643                     | <0.001             | 4.98             | 2                             | 8   | 42  | R Middle cingulate gyrus       |
|                                                 |                          |                    | 3.68             | -8                            | 20  | 26  | L Anterior cingulate gyrus     |
|                                                 |                          |                    | 4.36             | 8                             | 20  | 28  | R Anterior cingulate gyrus     |
|                                                 |                          |                    | 4.32             | -10                           | -2  | 60  | L Superior motor area          |
|                                                 |                          |                    | 3.92             | 10                            | 6   | 64  | R Superior motor area          |
|                                                 |                          |                    | 4.2              | -60                           | -24 | 22  | L Supramarginal gyrus          |
|                                                 |                          |                    | 4.01             | -48                           | -22 | 22  | L Rolandic operculum           |
|                                                 |                          |                    | 3.88             | -34                           | -6  | 44  | L Precentral gyrus             |
|                                                 |                          |                    | 3.68             | -12                           | -38 | 52  | L middle cingulate             |
|                                                 | 1896                     | 0.001              | 4.67             | 60                            | 10  | 4   | R Rolandic operculum           |
|                                                 |                          |                    | 4.19             | 34                            | 26  | 4   | R Insula                       |
|                                                 |                          |                    | 3.76             | 42                            | 14  | 4   | R Inferior frontal gyrus       |
|                                                 |                          |                    | 3.2              | 32                            | 6   | -24 | R Superior temporal pole       |
|                                                 |                          |                    | 3.1              | 32                            | 6   | -32 | R Parahippocampal gyrus        |
|                                                 | 6                        | 0.025              | 3.12             | 34                            | 4   | -26 | R Amygdala                     |
| <b><u>Early extinction (CS+ &gt; CS -)</u></b>  |                          |                    |                  |                               |     |     |                                |
| Negative correlation                            | 2206                     | <0.001             | 4.78             | -12                           | 46  | -6  | L Medial orbital frontal gyrus |
|                                                 |                          |                    | 3.79             | 16                            | 48  | -6  | R Medial orbital frontal gyrus |
|                                                 |                          |                    | 3.75             | -18                           | 54  | 24  | L Superior frontal gyrus       |
|                                                 |                          |                    | 3.3              | -34                           | 32  | -10 | L Inferior frontal gyrus       |
|                                                 |                          |                    | 3.67             | 40                            | 40  | -8  | R Inferior frontal gyrus       |
|                                                 |                          |                    | 3.61             | -2                            | 34  | 0   | L Anterior cingulate gyrus     |
|                                                 | 1090                     | 0.012              | 3.06             | -8                            | -54 | 40  | L Precuneus                    |
|                                                 |                          |                    | 3.98             | 10                            | -52 | 24  | R Precuneus                    |
|                                                 |                          |                    | 3.86             | -10                           | -40 | 36  | L Middle cingulate gyrus       |
|                                                 |                          |                    | 2.89             | 8                             | -44 | 32  | R Middle cingulate gyrus       |
|                                                 |                          |                    | 3.02             | 0                             | -52 | 32  | L Posterior cingulate gyrus    |
|                                                 |                          |                    | 2.5              | -6                            | -64 | 22  | L Cuneus                       |
|                                                 |                          |                    | 2.45             | -12                           | -54 | 12  | L Calcarine gyrus              |
|                                                 | 1037                     | 0.015              | 3.79             | 58                            | -60 | 20  | R Middle temporal gyrus        |
|                                                 |                          |                    | 3.6              | 42                            | -56 | 28  | R Angular gyrus                |
|                                                 |                          |                    | 3.05             | 56                            | -58 | 38  | R Inferior parietal gyrus      |
|                                                 |                          |                    | 2.93             | 36                            | -80 | 32  | R Middle occipital gyrus       |
| <b><u>Late extinction (CS+ &gt; CS -)</u></b>   |                          |                    |                  |                               |     |     |                                |
| Positive correlation                            | 8709                     | <0.001             | 3.97             | -38                           | -18 | -4  | L Insula                       |
|                                                 |                          |                    | 4.61             | 52                            | 8   | 2   | R insula                       |
|                                                 |                          |                    | 3.88             | -38                           | -26 | 20  | L Rolandic operculum           |
|                                                 |                          |                    | 4.14             | 42                            | 6   | 12  | R Rolandic operculum           |
|                                                 |                          |                    | 4.13             | 20                            | 2   | -4  | R Pallidum                     |
|                                                 |                          |                    | 3.95             | -54                           | -22 | 18  | L Supramarginal gyrus          |
|                                                 | 4187                     | <0.001             | 4.12             | -8                            | 8   | 42  | L Middle cingulate gyrus       |
|                                                 |                          |                    | 3.98             | 10                            | 16  | 36  | R Middle cingulate gyrus       |
|                                                 |                          |                    | 3.94             | -10                           | 24  | 30  | L Anterior cingulate gyrus     |

|      |        |      |    |     |    |                           |
|------|--------|------|----|-----|----|---------------------------|
| 2047 | <0.001 | 3.82 | 6  | 14  | 50 | R Superior motor area     |
|      |        | 3.88 | 62 | -34 | 20 | R Superior temporal gyrus |
|      |        | 3.71 | 34 | -14 | -8 | R Putamen                 |
|      |        | 3.59 | 48 | -32 | 24 | R Supramarginal gyrus     |
|      |        | 2.5  | 42 | -14 | 36 | R Precentral gyrus        |

All results were  $p < 0.05$ , cluster level family-wise error corrected and  $p < 0.01$  voxel level uncorrected

<sup>a</sup>Corrected for the volume of the right amygdala,  $p < 0.05$  voxel level family-wise error corrected

**TABLE S3. Neural correlates of aversive conditioning and extinction: exploring the relation with state anxiety, and the type and amount of substance used**

|                                        | Cluster size<br># voxels | Cluster<br>P-value | Voxel<br>z-value | Peak voxel<br>MNI-coordinates |      |     | Voxel region                |    |                          |
|----------------------------------------|--------------------------|--------------------|------------------|-------------------------------|------|-----|-----------------------------|----|--------------------------|
| <b>Early extinction (CS+ &gt; CS-)</b> |                          |                    |                  |                               |      |     |                             |    |                          |
| Mild > heavy cannabis use              | 1173                     | 0.012              | 3.51             | -58                           | -34  | 12  | L Superior temporal gyrus   |    |                          |
|                                        |                          |                    | 3.26             | -60                           | -24  | 16  | Left Supramarginal gyrus    |    |                          |
|                                        |                          |                    | 3.16             | -62                           | -2   | 14  | L Postcentral gyrus         |    |                          |
|                                        |                          |                    | 3.15             | -50                           | -22  | 0   | L Middle Temporal gyrus     |    |                          |
|                                        |                          |                    | 3.01             | -38                           | -26  | 14  | L Herschl Gyrus             |    |                          |
|                                        |                          |                    | 2.9              | -56                           | 0    | 10  | L Rolandic Opperculum       |    |                          |
| <b>Late extinction (CS+ &gt; CS-)</b>  |                          |                    |                  |                               |      |     |                             |    |                          |
| Negative correlation STAI              | 1912                     | 0.001              | 4.08             | 12                            | -52  | -16 | L/R Cerebellum              |    |                          |
| Mild > Heavy cannabis use              | 1872                     | 0.001              | 4.11             | -60                           | 6    | 8   | Left inferior frontal gyrus |    |                          |
|                                        |                          |                    | 3.57             | -52                           | -4   | -2  | L Superior temporal gyrus   |    |                          |
|                                        |                          |                    | 3.38             | -60                           | -34  | 8   | Left middle temporal gyrus  |    |                          |
|                                        |                          |                    | 3.17             | -50                           | -26  | 28  | L Supramarginal gyrus       |    |                          |
|                                        |                          |                    | 3.72             | -20                           | -72  | 38  | L Superior occipital gyrus  |    |                          |
| Heavy > Mild cocaine use               | 4464                     | <0.001             | 3.59             | -34                           | -64  | 38  | L Middle occipital gyrus    |    |                          |
|                                        |                          |                    | 3.57             | -28                           | -74  | 42  | L inferior parietal         |    |                          |
|                                        |                          |                    | 3.5              | -26                           | -74  | 46  | L Superior parietal gyrus   |    |                          |
|                                        |                          |                    | 3.5              | 10                            | -34  | 36  | R middle cingulate gyrus    |    |                          |
|                                        |                          |                    | 3.39             | -26                           | -70  | 36  | L Superior occipital gyrus  |    |                          |
|                                        |                          |                    | 3.3              | -8                            | -46  | 30  | L Posterior cingulate       |    |                          |
|                                        |                          |                    | 3.29             | -10                           | -52  | 50  | L Precuneus                 |    |                          |
|                                        |                          |                    | 2104             | <0.001                        | 3.67 | -40 | 28                          | 8  | L inferior frontal gyrus |
|                                        |                          |                    |                  |                               | 3.49 | -34 | 34                          | 44 | L Middle frontal gyrus   |
|                                        |                          |                    |                  |                               | 3.38 | -32 | 26                          | 10 | L Insula                 |
|                                        | 3.34                     | -8                 |                  |                               | 48   | 48  | L Superior frontal gyrus    |    |                          |
|                                        |                          |                    | 3.05             | -40                           | 10   | 40  | L Precentral gyrus          |    |                          |

All results were  $p < 0.05$ , cluster level family-wise error corrected and  $p < 0.01$  voxel level uncorrected
